# Supplementary material for: Expression of Concern: Modeling the Interaction between Quinolinate and the Receptor for Advanced Glycation End Products (RAGE): Relevance for Early Neuropathological Processes
Source: PubMed Central journal article supplement (PMC9928092; doi:10.1371/journal.pone.0281905), 2023-02-14

# Resumen 2 CORREGIDO

## Ajustes de Titulación Fluorimétrica

Archivos: **sVC1 / Ac. Quin** Folder: **F.Reyes / I.Serratos Febrero 2014**

|               | a<br>Value | a $\pm$<br>Std Error | K <sub>d</sub> ( $\mu$ M)<br>Value | k $\pm$ ( $\mu$ M)<br>Standard Error | Statistics<br>Red Chi-Sqr | Statistics<br>Adj. R-Square | K <sub>a</sub> (M <sup>-1</sup> ) | k + (M <sup>-1</sup> ) |
|---------------|------------|----------------------|------------------------------------|--------------------------------------|---------------------------|-----------------------------|-----------------------------------|------------------------|
| <b>pH 9.0</b> |            |                      |                                    |                                      |                           |                             |                                   |                        |
| B             | 0.47206    | 0.01448              | 0.01833                            | 0.00578                              | 1.16E-03                  | 0.93797                     | 5.46E+07                          | 1.72E+07               |
| D             | 0.47289    | 0.01296              | 0.02475                            | 0.00596                              | 8.51E-04                  | 0.95603                     | 4.04E+07                          | 9.73E+06               |
| F             | 0.41057    | 0.01296              | 0.04139                            | 0.00888                              | 7.02E-04                  | 0.95134                     | 2.42E+07                          | 5.18E+06               |
| H             | 0.4093     | 0.01332              | 0.04353                            | 0.0094                               | 7.26E-04                  | 0.94869                     | 2.30E+07                          | 4.96E+06               |
| J             | 0.36223    | 0.00965              | 0.04649                            | 0.008                                | 3.74E-04                  | 0.9675                      | 2.15E+07                          | 3.70E+06               |
| L             | 0.34295    | 0.00956              | 0.04745                            | 0.00846                              | 3.64E-04                  | 0.96547                     | 2.11E+07                          | 3.76E+06               |
| <b>pH 7.4</b> |            |                      |                                    |                                      |                           |                             |                                   |                        |
| N             | 0.25821    | 0.01065              | 0.0172                             | 0.00725                              | 5.44E-04                  | 0.90124                     | 5.81E+07                          | 2.45E+07               |
| P             | 0.25911    | 0.00783              | 0.04462                            | 0.00887                              | 2.50E-04                  | 0.9621                      | 2.24E+07                          | 4.46E+06               |
| R             | 0.16845    | 0.00682              | 0.04366                            | 0.01121                              | 1.55E-04                  | 0.93637                     | 2.29E+07                          | 5.88E+06               |

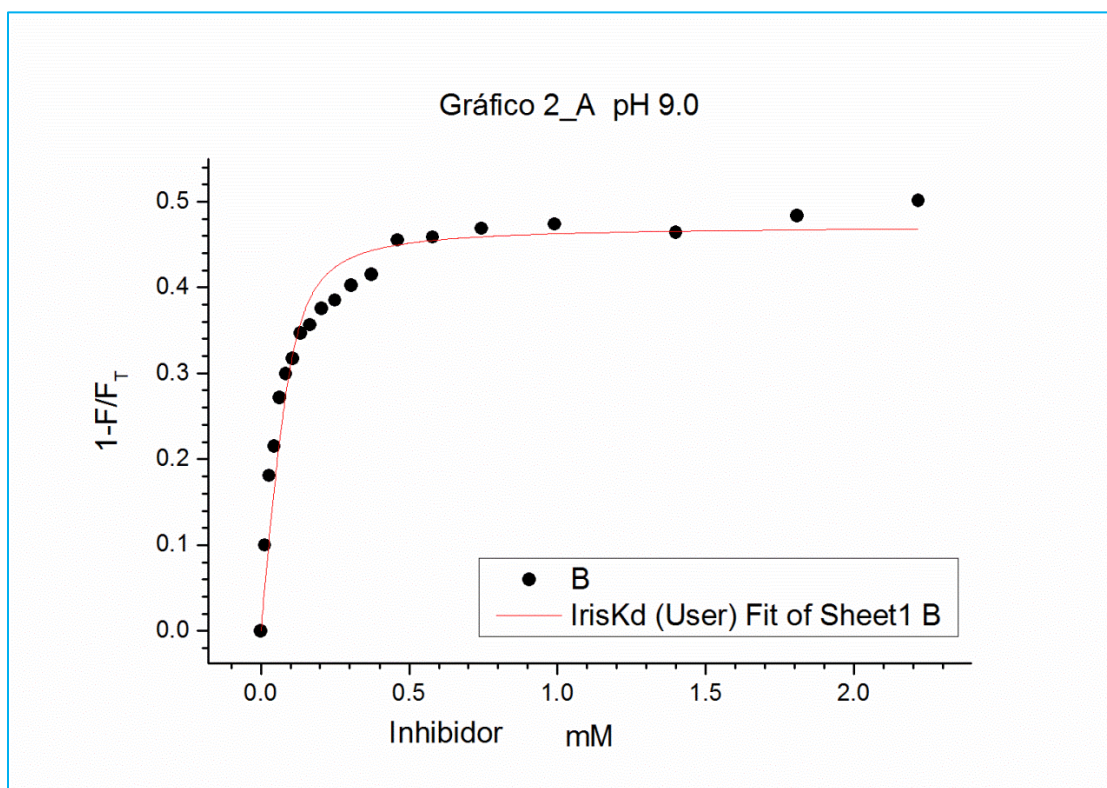

Gráfico 2\_B pH 9.0

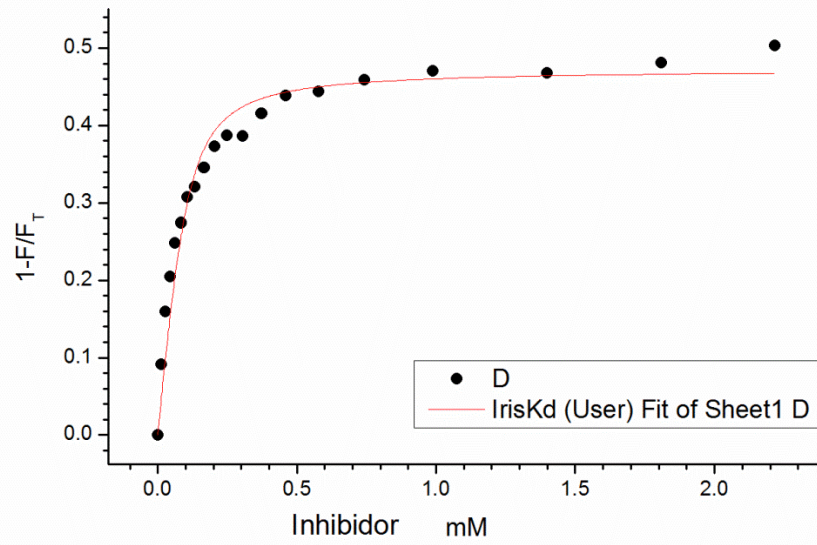

Gráfico 2\_C pH 9.0

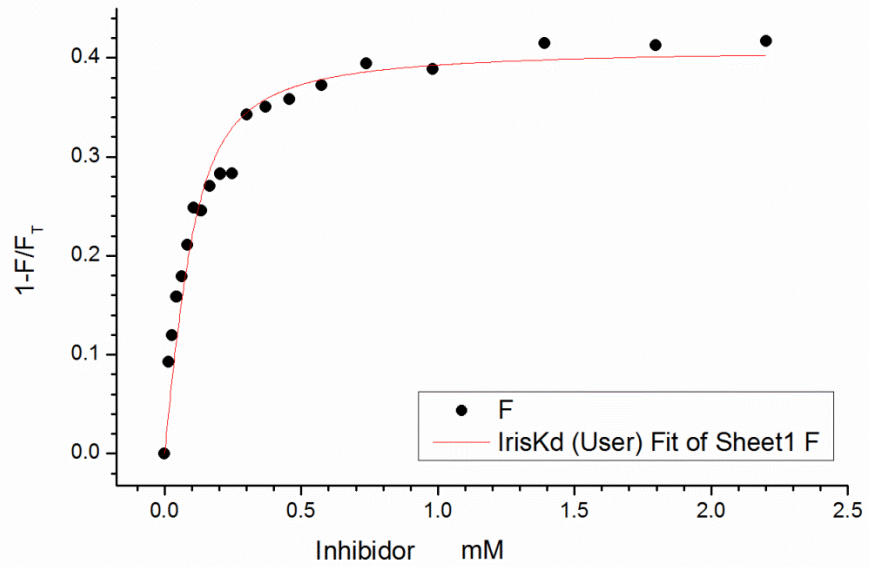

## Figure 7b-Titration fluorescence

Gráfico 2\_D pH 9.0

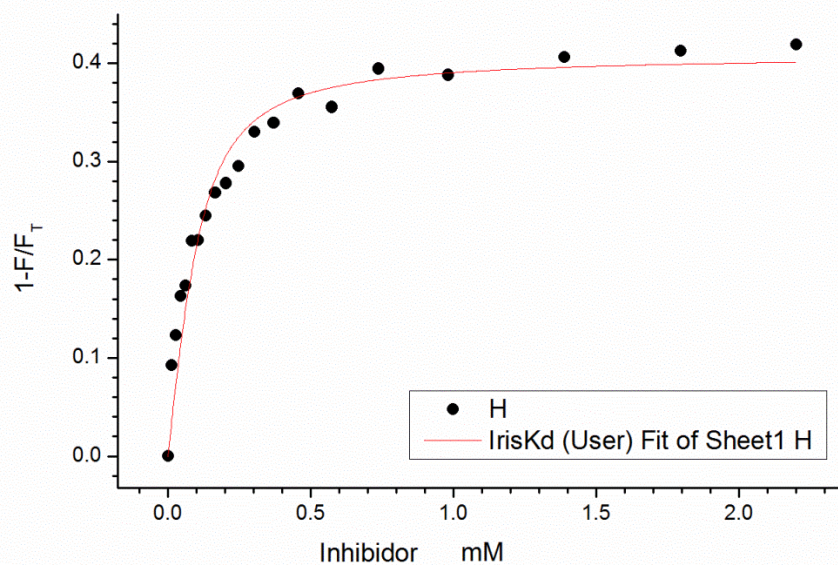

Gráfico 2\_E pH 9.0

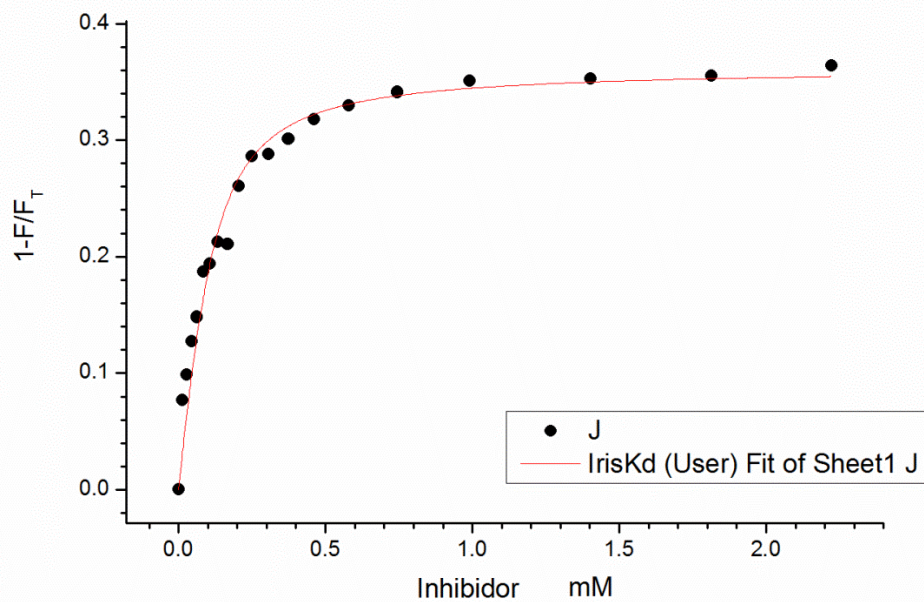

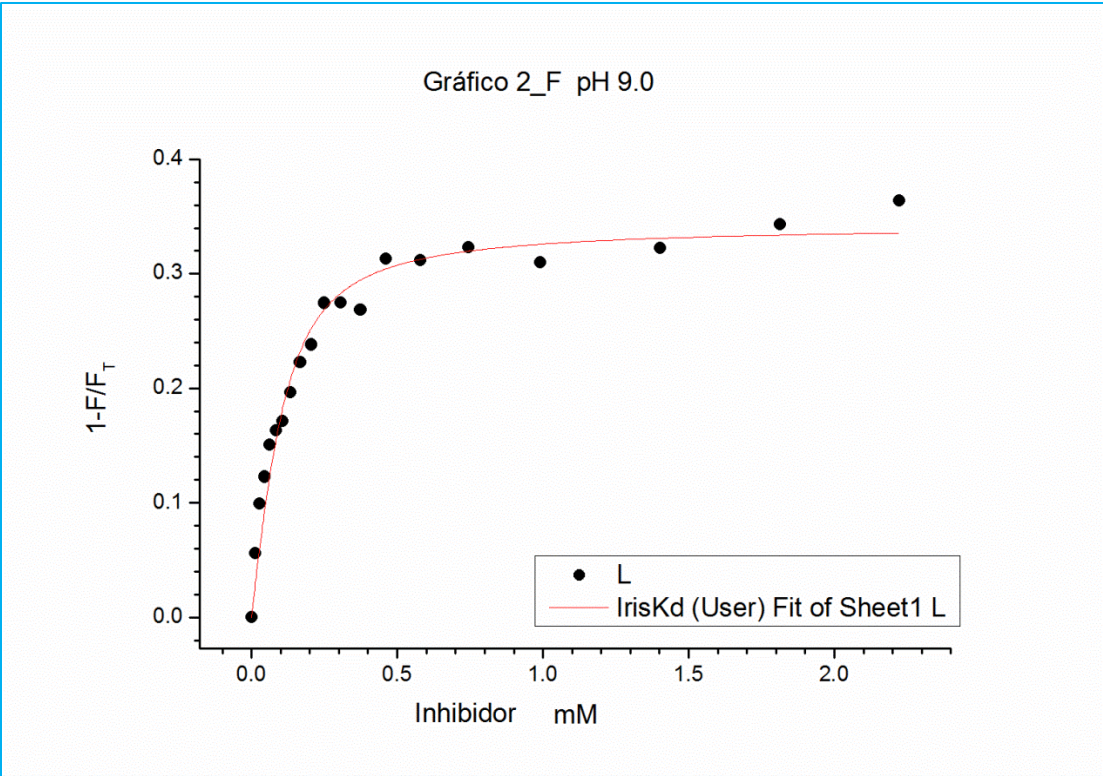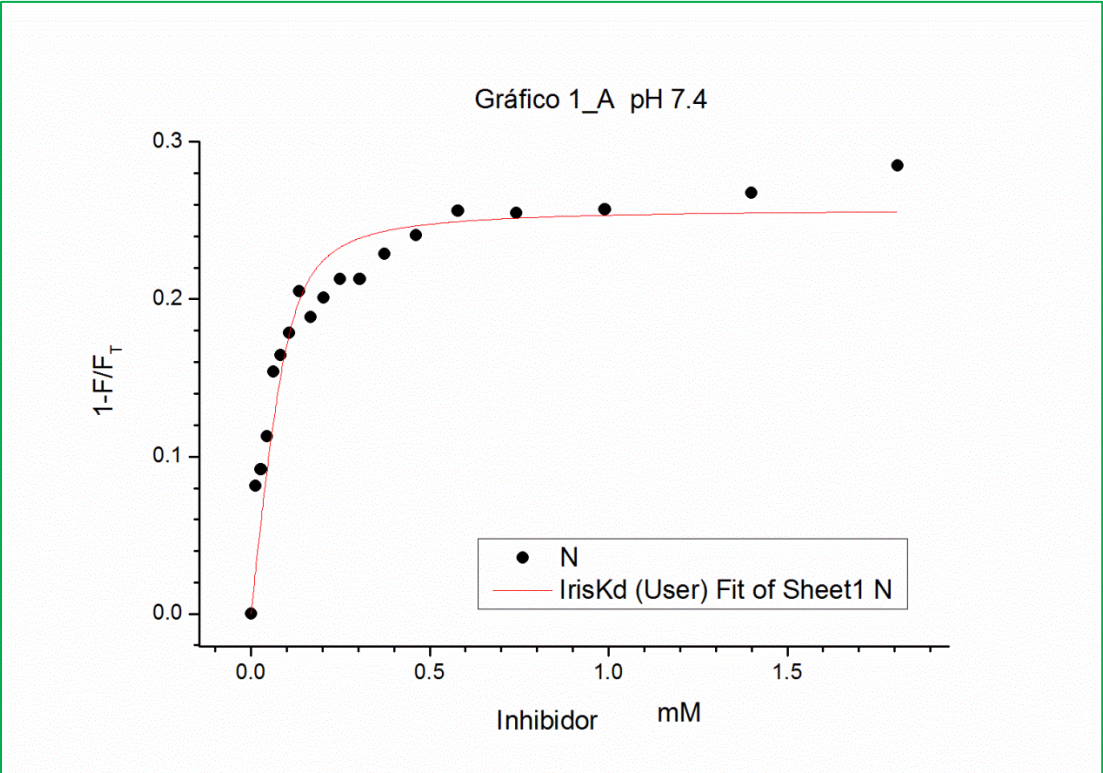

## Figure 7a-Titration fluorescence

Gráfico 1\_B pH 7.4

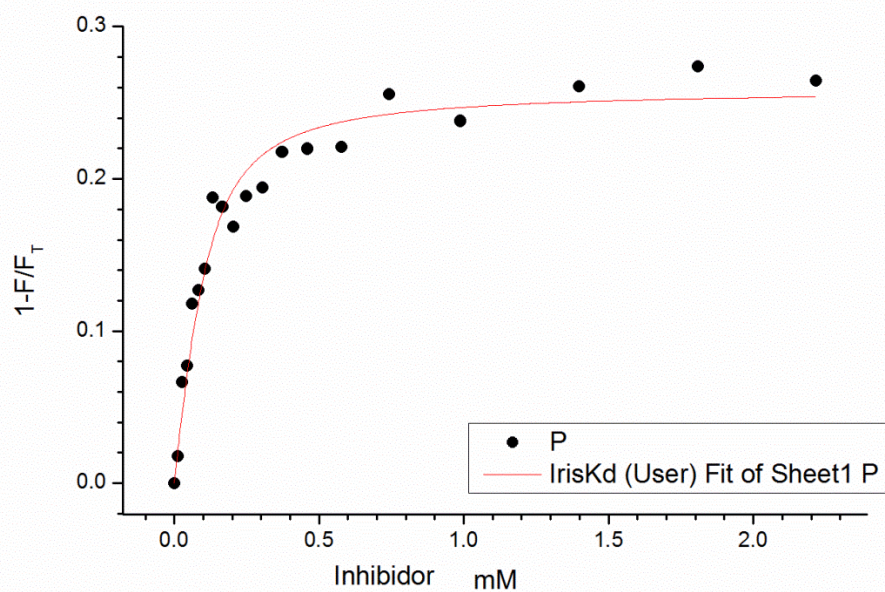

Gráfico 1\_C pH 7.4

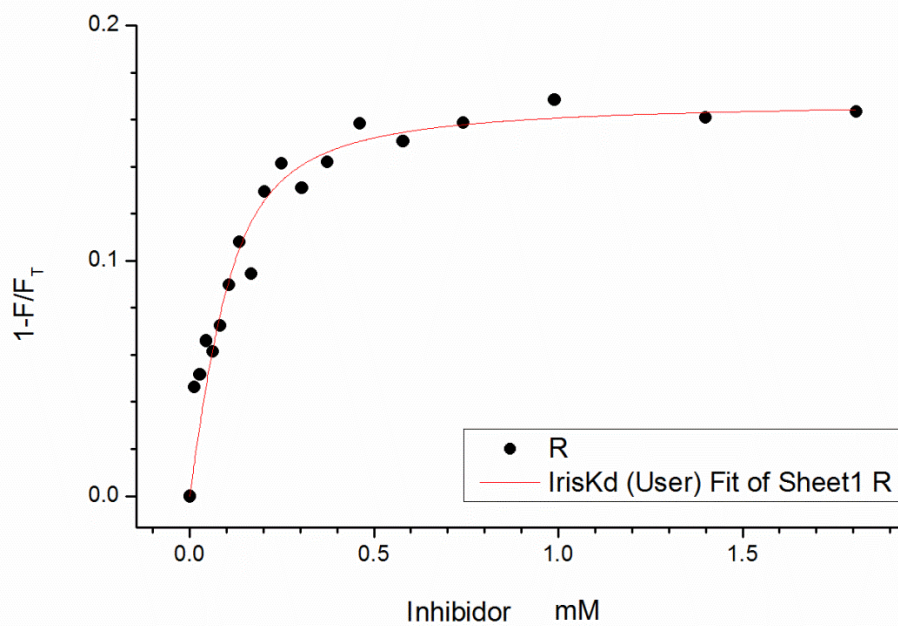

Supplement: pone.0281905.s007.pdf [file pone.0281905.s007.pdf]
